# Supplementary material
Source: PubMed Central journal article supplement (PMC5192123)
Supplement: AAC.01651-16_zac001175836s1.pdf [file AAC.01651-16_zac001175836s1.pdf]

## Supplementary Data

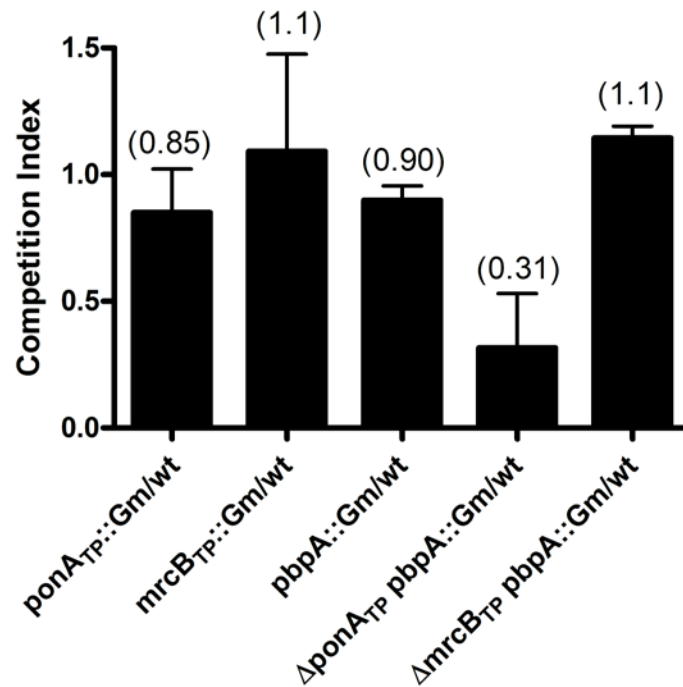

**Fig. S1:** *In vitro* competition assay of PBP mutant strains. Cell cultures of each *pbp* replacement mutant (Gm<sup>r</sup>) was mixed with wild-type *Pa* (PA14) in LB broth flasks, incubated at 37°C for 7 h and spread on LB with or without gentamycin, as described in Experimental Procedures. The competition index (mutant/wild type) from three independent experiments was calculated and is shown in parentheses.

**Table S1: Primers used in this study**

| Primers       | Sequence                             | Purpose                               |
|---------------|--------------------------------------|---------------------------------------|
| PBP1A-UpF     | GGCCAGTGCCAAGCTCTACAACCCGCTGGTCAAC   | Knock out TP domain of PBP1a in PA14  |
| PBP1A-UpR     | TTTGAAGCTAATTCGAATCTGTACGAAGCGCAGG   |                                       |
| PBP1A-DnF     | AAGATCCCCAATTCGATCAGGTACATGGGCTTCG   |                                       |
| PBP1A-DnR2    | CCATGATTACGAATTCCGACTATCCGAACCAGGTC  |                                       |
| PBP1B-UpF2    | GGCCAGTGCCAAGCTTGCTGCTGGAGCTGCACTAC  | Knock out TP domain of PBP1b in PA14  |
| PBP1B-UpR     | TTTGAAGCTAATTCG GATCGGATCGAAGCTGGTG  |                                       |
| PBP1B-DnF     | AAGATCCCCAATTCGACCGGTGCCTTGCAGGTG    |                                       |
| PBP1B-DnR2    | CCATGATTACGAATTGGCACCATCACCACCACGC   |                                       |
| PBP2-UpF      | GGCCAGTGCCAAGCTCTCGAACTGGTGGAGATCC   | Knock out PBP2 in PA14                |
| PBP2-UpR2     | TTTGAAGCTAATTCGCTGCTTCATGCGCTTCTC    |                                       |
| PBP2-DnF2     | AAGATCCCCAATTCGATGCAGCAGGTGGTGCATG   |                                       |
| PBP2-DnR      | CCATGATTACGAATTGCATCAGCAGCTTCATGAAC  |                                       |
| PBP3-UpF2     | GGCCAGTGCCAAGCTGGCTTCAGCTTCCTCAACG   | Knock out PBP3 in PA14                |
| PBP3-UpR      | TTTGAAGCTAATTCGACGATTCGCCAGACGATG    |                                       |
| PBP3-DnF2     | AAGATCCCCAATTCGCAGCAAGGTCATGGCTGGC   |                                       |
| PBP3-DnR2     | CCATGATTACGAATTCAGCAGGTTGCTCAGGTTG   |                                       |
| pbp1A-GT-UPF  | GGCCAGTGCCAAGCTAGTTCATCTCGGAAAGCC    | Knock out GT domain of PBP1a in PA14  |
| pbp1A-GT-UPR2 | TTTGAAGCTAATTCGGGAGATCAGCTTGCCGTC    |                                       |
| pbp1A-GT-DnF3 | AAGATCCCCAATTCGCAAGCTCGGCTTCATCGAC   |                                       |
| pbp1A-GT-DnR  | CCATGATTACGAATTCTCTGCTCGAAGGAGAAGC   |                                       |
| pbp1B-GT-UPF  | GGCCAGTGCCAAGCTGATCAGGGTCTGGCTCAC    | Knock out GT domain of PBP1b in PA14  |
| pbp1B-GT-UPR2 | TTTGAAGCTAATTCGGATCAGCAGCGGCTCAAG    |                                       |
| pbp1B-GT-DnF3 | AAGATCCCCAATTCGGACCCAGCAGGAAGTCGAC   |                                       |
| pbp1B-GT-DnR  | CCATGATTACGAATTGCGACCTCCATCGGACTG    |                                       |
| pbp3x-UpF     | GGCCAGTGCCAAGCTTAACTGCGCGAACTGATGGAC | Knock out PBP3x in PA14               |
| pbp3x-UpR     | TTTGAAGCTAATTCGTATGCAAGGGCACACTGG    |                                       |
| pbp3x-DnF     | AAGATCCCCAATTCGGACAACCTGCAGGACAGCC   |                                       |
| pbp3x-DnR     | CCATGATTACGAATTCCAGCAGGTGTAGTTCAGCAC |                                       |
| SCN-pbp1A-F   | TTGAGCCTGGCCGAGATG                   | Screening primers for PBP1a TP mutant |
| SCN-pbp1A-R   | GCAACGACGTGATCATGG                   |                                       |
| SCN-pbp1B-F   | CCTGAGCAACGAACGCAG                   | Screening primers for PBP1b TP mutant |
| SCN-pbp1B-R   | GGAAAGTCTGGATCGGTGC                  |                                       |
| SCN-pbp2-F    | GGAAGGCTGGCAGGAATAC                  | Screening primers for PBP2 mutant     |
| SCN-pbp2-R    | CGCTTGGACAGGTACCAG                   |                                       |
| SCN-pbp3-F2   | GAACTGGGCGATGAGGTG                   | Screening primers for PBP3 mutant     |
| SCN-pbp3-R2   | GTAGTCCACCACCACCAGC                  |                                       |
| SCN-pbp1aTG-F | CACTTCCTCCAGCGGATAG                  | Screening primers for                 |

|                 |                                                    |                                                 |
|-----------------|----------------------------------------------------|-------------------------------------------------|
| SCN-pbp1aTG-R   | GGTGAAGCCGTTGTCCAG                                 | PBP1a GT mutant                                 |
| SCN-pbp1bTG-F   | GATGACCTCGAAGCGCTC                                 | Screening primers<br>For PBP1b GT mutant        |
| SCN-pbp1bTG-R   | AGTGAGGACGCTGCGGATC                                |                                                 |
| SCN-pbp3x-F     | GGACCTCTGGAGCGGCTTC                                | Screening primers<br>For PBP3x mutant           |
| SCN-pbp3x-R     | CGCTTCGTGATCGACATGG                                |                                                 |
| mini-CTX1-F     | CCGTCCTTGCTGAATTAG                                 | Flanking primers of<br>pMini-CTX1               |
| mini-CTX1-R     | TCAAAAGGTCATCCACCG                                 |                                                 |
| Pser-up         | CGAGTGGTTTAAGGCAACG                                | Flanking primers of<br><i>attB</i> site in PA14 |
| Pser-down       | TCGGCCTGGTGGAAACAAC                                |                                                 |
| GFP-F           | AAGCATATGGCCATGAGTAAAGGAGAAGAAC                    | Amplification of GFP                            |
| GFP-R           | TTTGTATAGTTCATCCATGC                               |                                                 |
| GFP-PBP1a-F     | AAGCATATGGCCATGGCGCGCCTGCTGAAGTTCC                 | pCAB-gfp-ponA                                   |
| pbp1A-R         | GAATTGGGTACCATGTCAGAACAGGTTCGATCGGC                |                                                 |
| GFP-PBP3-F      | GATGAACTATACAAAATGAACTGAATTATTTCC                  | pCAB-gfp-ftsI                                   |
| PBP3-R          | GAATTGGGTACCATGTCAGCCACGCCCTCCTTTTG                |                                                 |
| 7605-F          | GCAGCCCGGGGGATCCG                                  | For amplification of<br>mCherry                 |
| mCherry-R2      | CTTGTACAGCTCGTCCATGCC                              |                                                 |
| mCherry-PBP1A-F | GACGAGCTGTACAAGATGCGCCTGCTGAAGTTCC                 | For pMP7605-PBP1a                               |
| mCherry-PBP1A-R | TAGAACTAGTGGATC <sub>c</sub> TCAGAACAGGTTCGATCGGC  |                                                 |
| mCherry-PBP1B-F | GACGAGCTGTACAAGATGACGCGTCCCGATCC                   | For pMP7605- PBP1b                              |
| mCherry-PBP1B-R | TAGAACTAGTGGATC <sub>c</sub> TCAATTCAGCCAGCCTCGTAC |                                                 |
| mCherry-PBP2-F  | GACGAGCTGTACAAGATGCCGCAGCCGATCCAC                  | For pMP7605- PBP2                               |
| mCherry-PBP2-R  | TAGAACTAGTGGATC <sub>c</sub> TTACTGTTCAAGGGCGGG    |                                                 |
| mCherry-PBP3-F  | GACGAGCTGTACAAGATGAACTGAATTATTTCC                  | For pMP7605- PBP3                               |
| mCherry-PBP3-R  | TAGAACTAGTGGATC <sub>c</sub> TCAGCCACGCCCTCCTTTTG  |                                                 |
